# Supplementary material
Source: HighWire-hosted journal article supplement (https://jitc.bmj.com/content/8/1/e000613)
Supplement: inline-supplementary-material-3 [file inline-supplementary-material-3.pdf]

S3

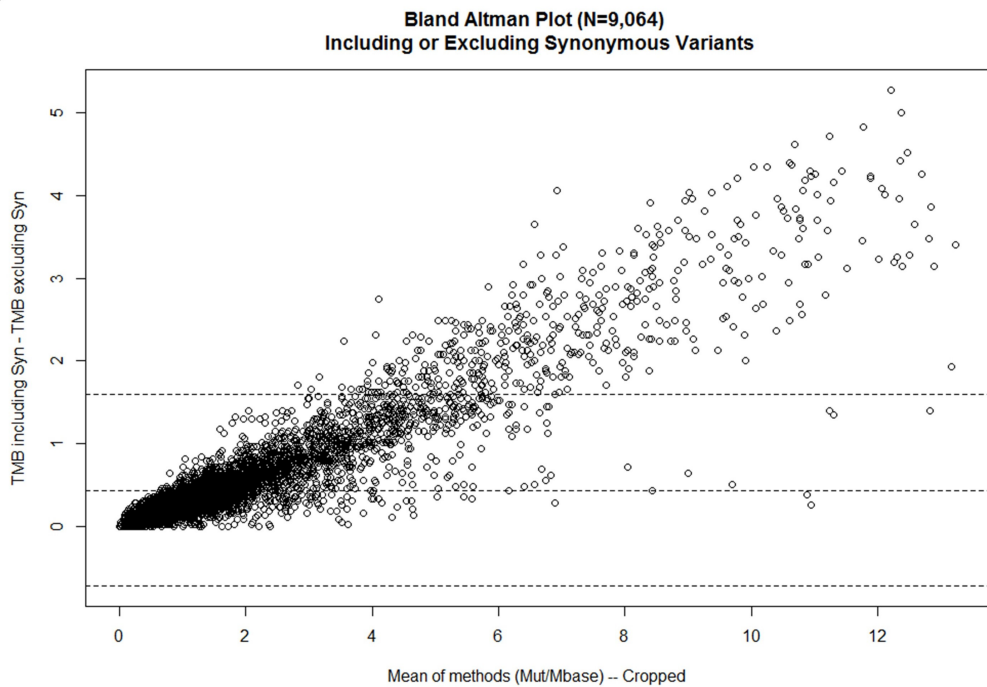

Zoomed difference plot with x axis truncated to values less than 15 variants/Mbase
