# Supplementary material
Source: HighWire-hosted journal article supplement (https://jitc.bmj.com/content/8/1/e000613)

S5

**Tumor Type Composition of Tumor Mutation Burden (TMB) Quartiles**  
 TMB by Whole Exome Sequencing - Synonymous Mutations Excluded

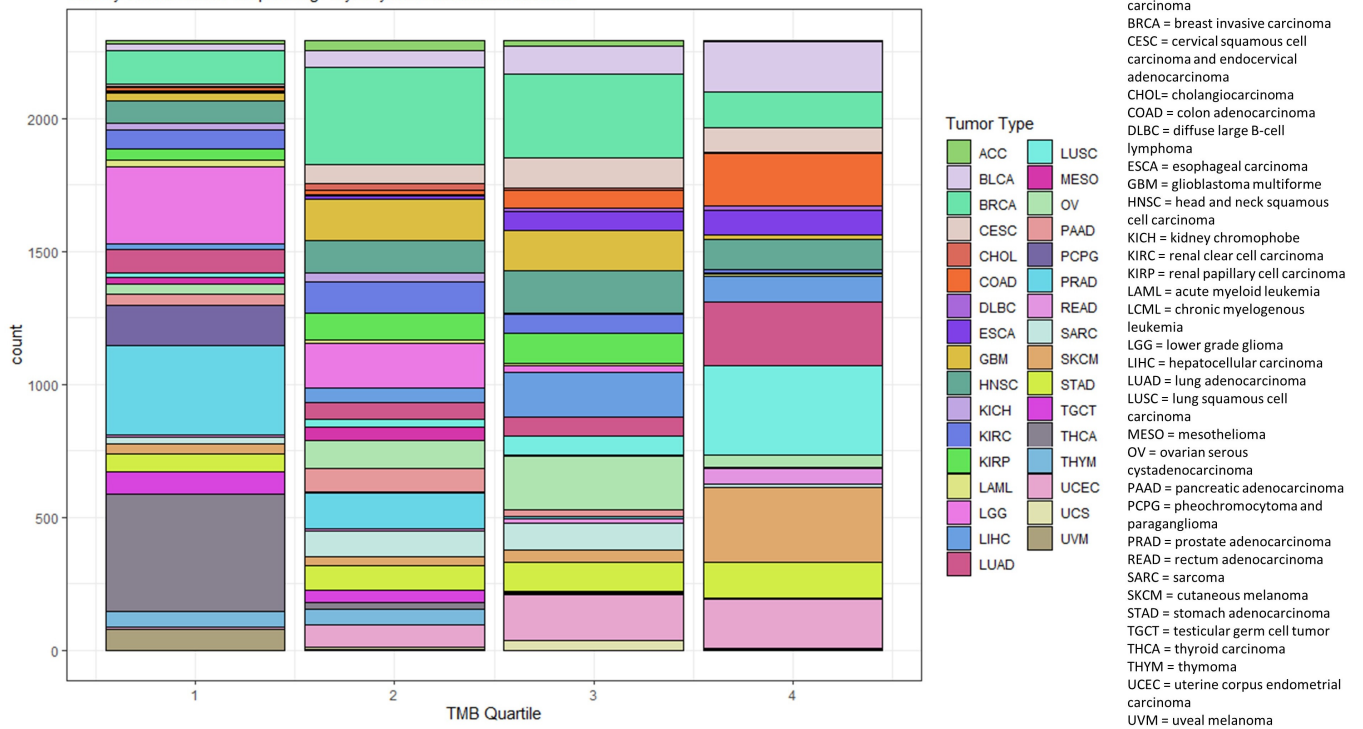

Supplement: inline-supplementary-material-5 [file inline-supplementary-material-5.pdf]
