# Supplementary material
Source: HighWire-hosted journal article supplement (https://jitc.bmj.com/content/8/1/e000613)

S8

Survival Curve - Head and Neck Squamous Carcinoma  
N = 472

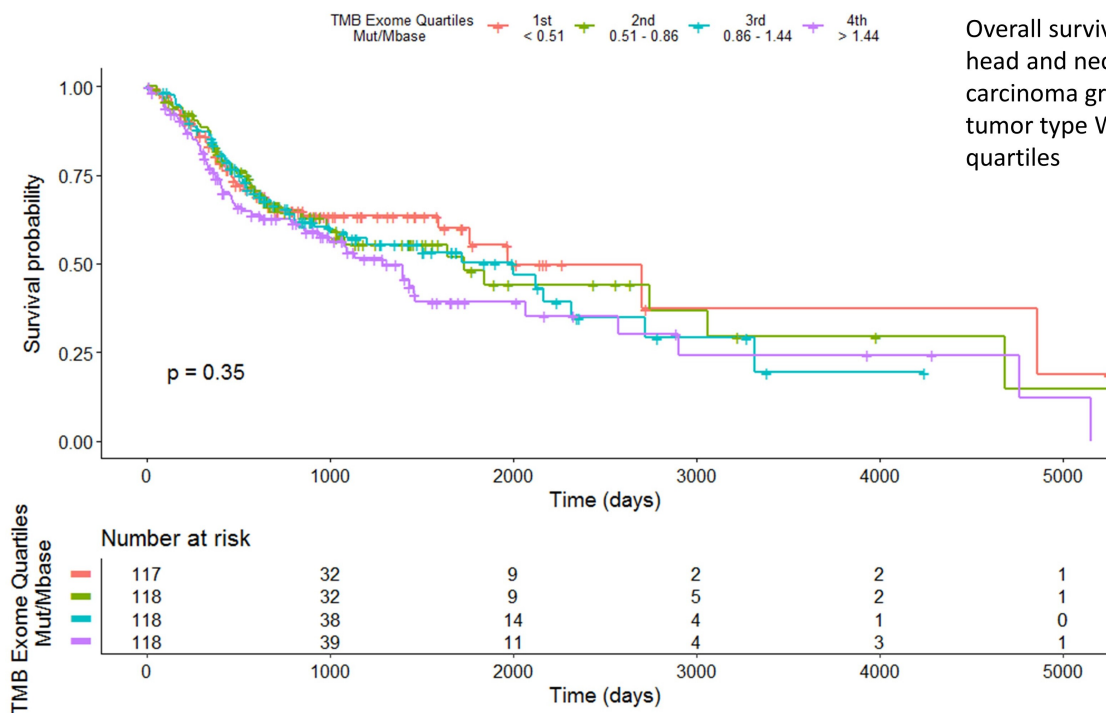

Supplement: inline-supplementary-material-7 [file inline-supplementary-material-7.pdf]
