# Supplementary material
Source: HighWire-hosted journal article supplement (https://jitc.bmj.com/content/8/1/e000613)

S10

Survival Curve - Hepatocellular Carcinoma  
N = 337

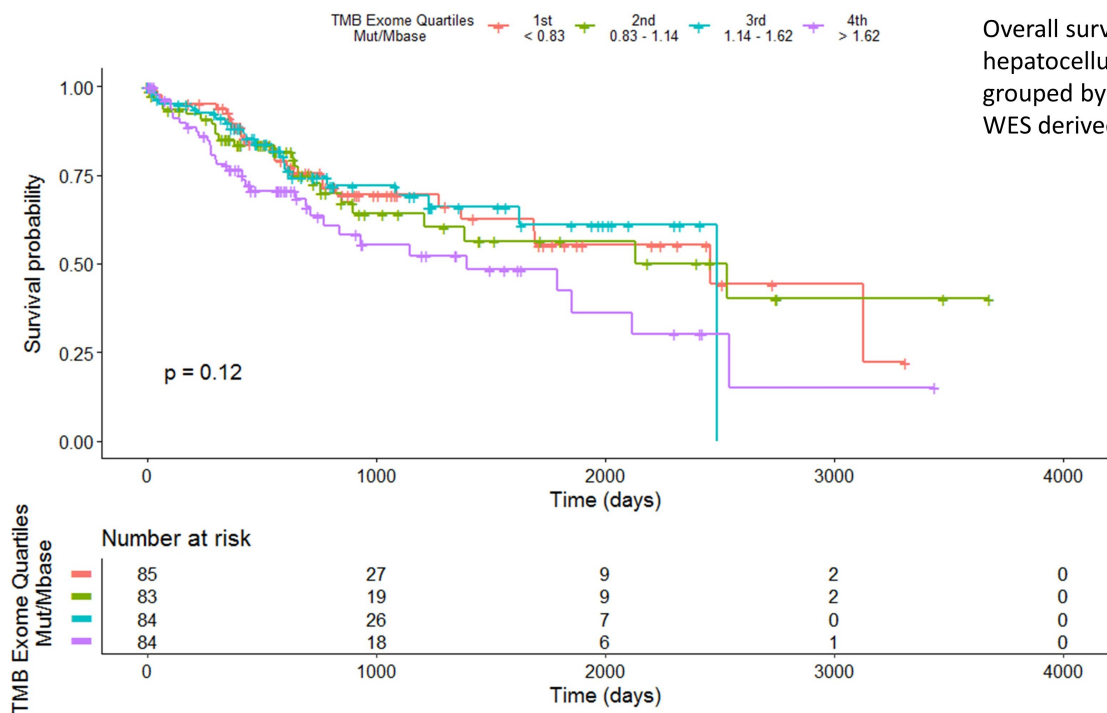

Supplement: inline-supplementary-material-9 [file inline-supplementary-material-9.pdf]
