# Supplementary material
Source: HighWire-hosted journal article supplement (https://jitc.bmj.com/content/8/1/e000613)

# S11

Survival Curve - Lung Adenocarcinoma  
N = 465

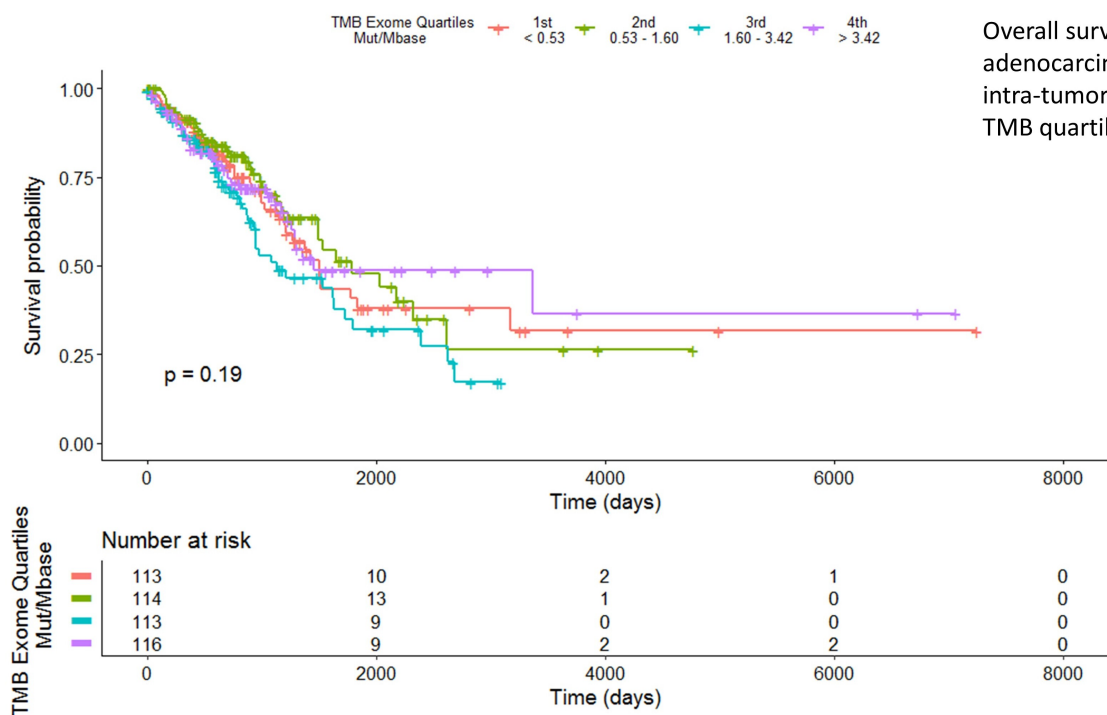

Supplement: inline-supplementary-material-10 [file inline-supplementary-material-10.pdf]
