# Supplementary material
Source: HighWire-hosted journal article supplement (https://jitc.bmj.com/content/8/1/e000613)

# S12

Survival Curve - Lung Squamous Cell Carcinoma  
N = 453

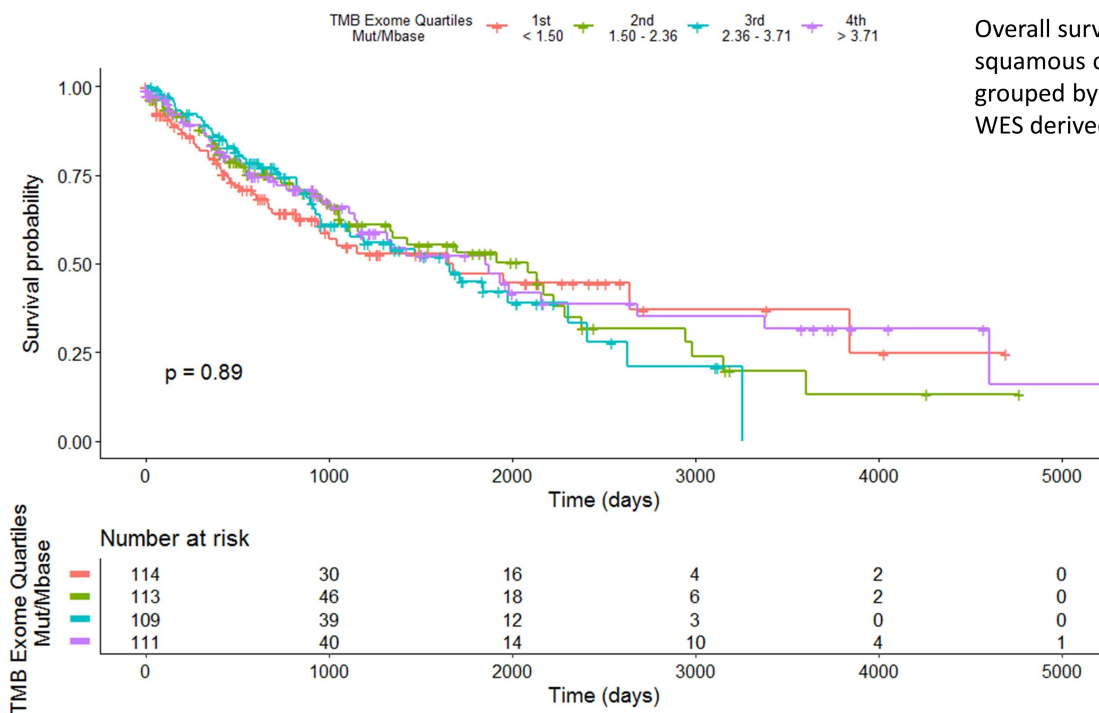

Supplement: inline-supplementary-material-11 [file inline-supplementary-material-11.pdf]
