# Supplementary material
Source: HighWire-hosted journal article supplement (https://jitc.bmj.com/content/8/1/e000613)

# S13

Survival Curve - Ovarian Cancer  
N = 391

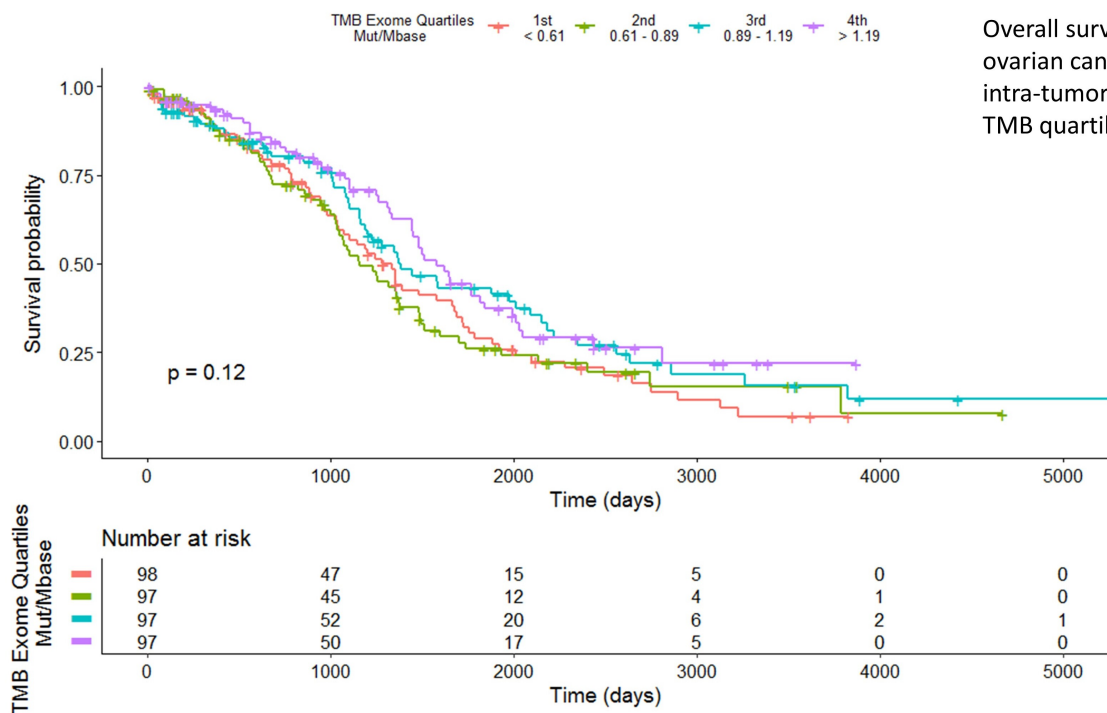

Supplement: inline-supplementary-material-12 [file inline-supplementary-material-12.pdf]
