# Supplementary material
Source: HighWire-hosted journal article supplement (https://jitc.bmj.com/content/8/1/e000613)

# S14

Survival Curve - Prostate Adenocarcinoma  
N = 479

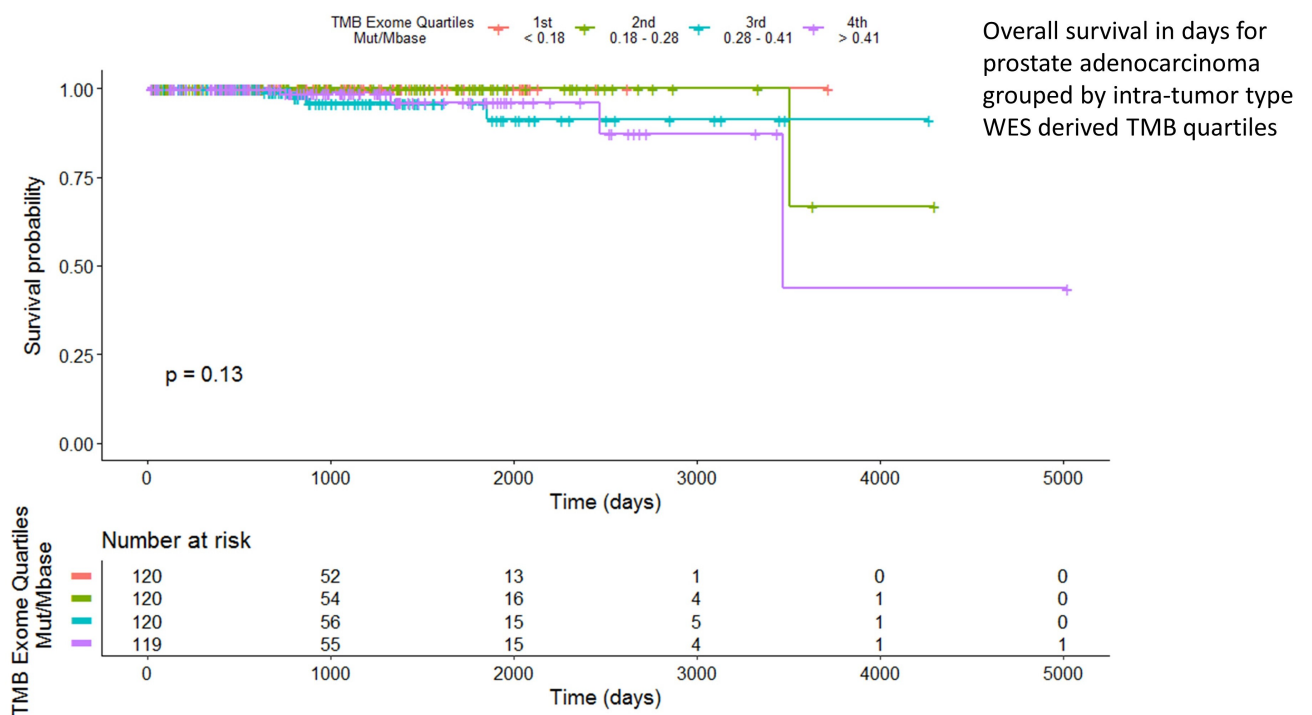

Supplement: inline-supplementary-material-13 [file inline-supplementary-material-13.pdf]
