# Supplementary material
Source: HighWire-hosted journal article supplement (https://jitc.bmj.com/content/8/1/e000613)

# S15

Survival Curve - Cutaneous Melanoma  
N = 397

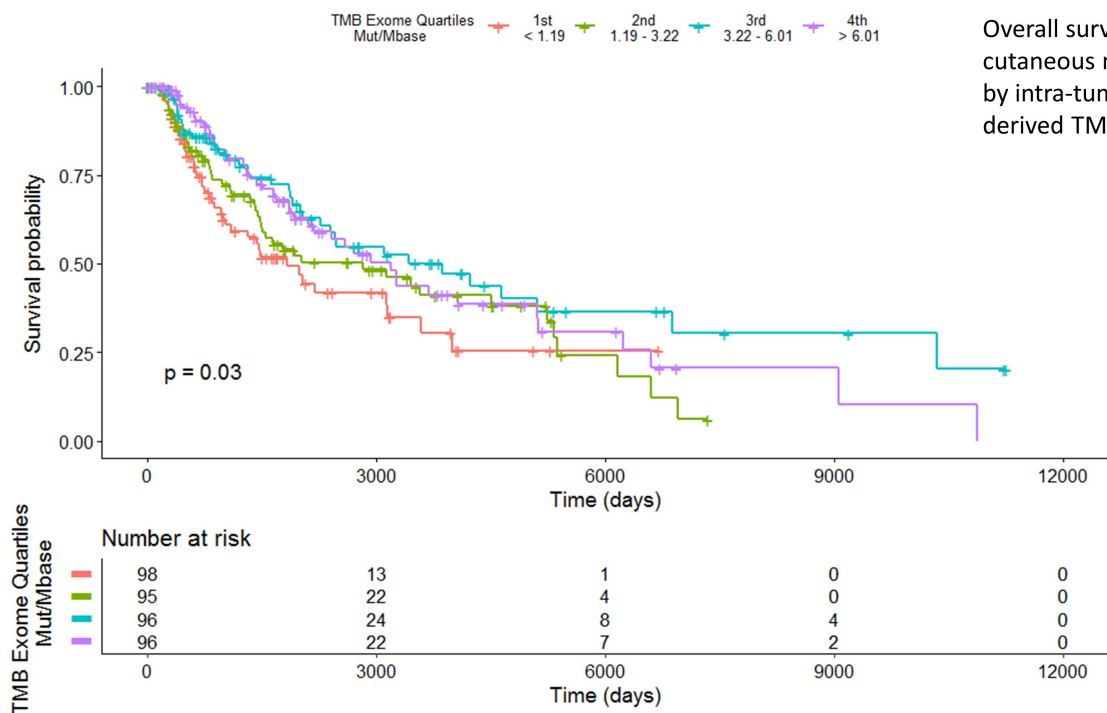

Supplement: inline-supplementary-material-14 [file inline-supplementary-material-14.pdf]
