# Supplementary material
Source: HighWire-hosted journal article supplement (https://jitc.bmj.com/content/8/1/e000613)

S17

Survival Curve - Thyroid Carcinoma  
N = 481

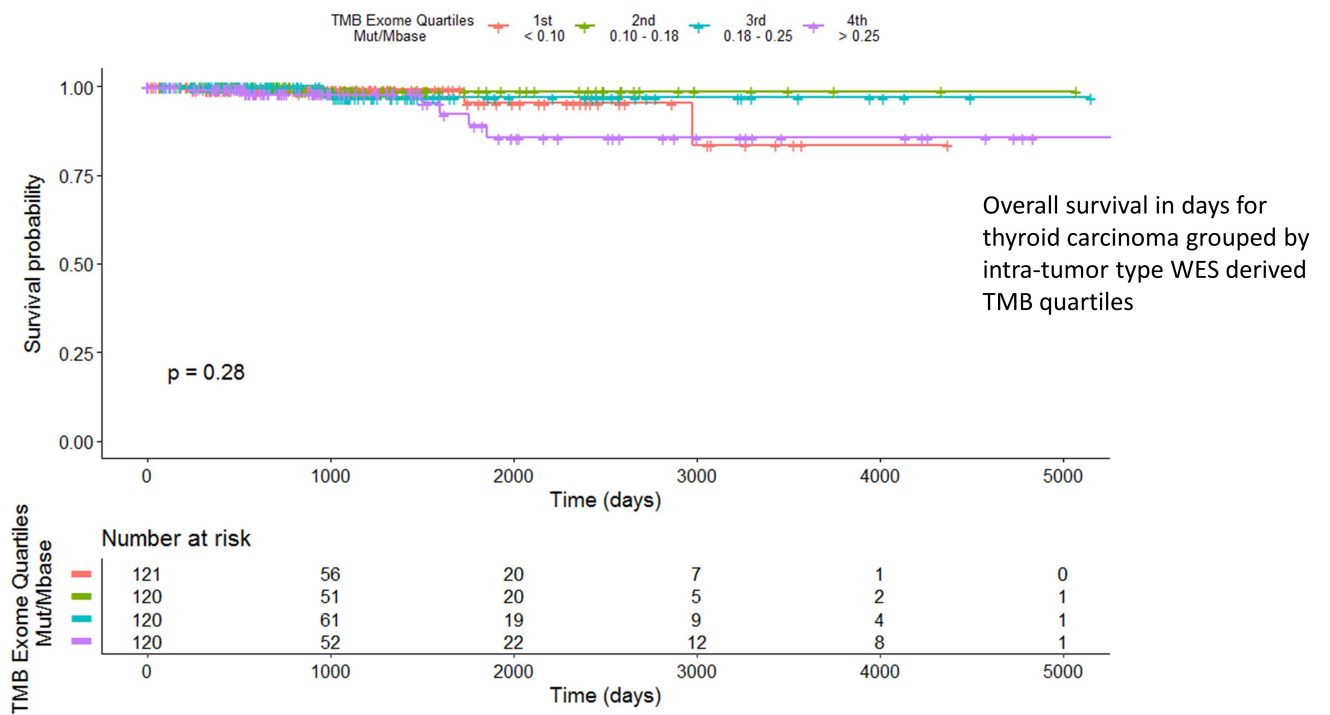

Supplement: inline-supplementary-material-16 [file inline-supplementary-material-16.pdf]
