# Supplementary material
Source: HighWire-hosted journal article supplement (https://jitc.bmj.com/content/8/1/e000613)

S18

Survival Curve - Uterine Corpus Endometrial Carcinoma  
N = 450

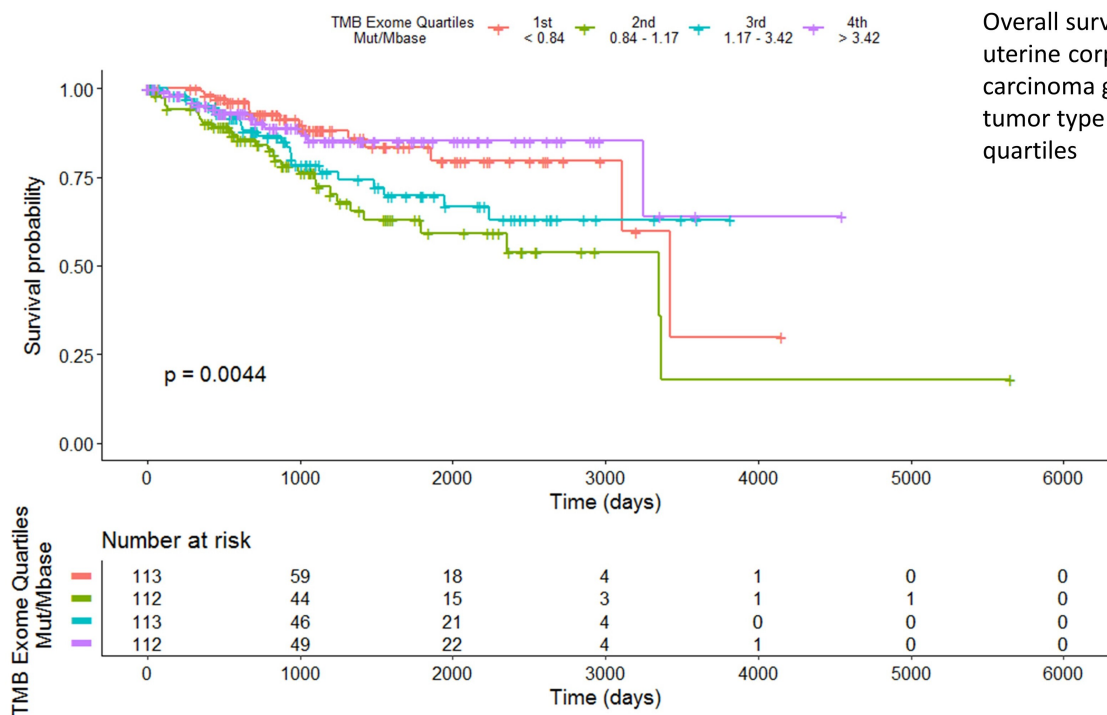

Supplement: inline-supplementary-material-17 [file inline-supplementary-material-17.pdf]
